# Supplementary material for: Pain-Associated Transcriptome Changes in Synovium of Knee Osteoarthritis Patients
Source: PubMed Central journal article supplement (PMC6070955; doi:10.3390/genes9070338), 2018-07-04
Supplement: genes-09-00338-s001.pdf [file genes-09-00338-s001.pdf]

Table S1: Characteristic of 18 genes enriched in Gene Ontologies (GO) in the category of biological process

| No. | Gene Symbol<br>Gene Name                                               | PANTHER Family/Subfamily                                               | PANTHER Protein Class                                                                         | log2<br>Ratio | pValue   | Adjusted<br>P value |
|-----|------------------------------------------------------------------------|------------------------------------------------------------------------|-----------------------------------------------------------------------------------------------|---------------|----------|---------------------|
| 1   | <b>CPE</b><br>Carboxypeptidase E                                       | CARBOXYPEPTIDASE E<br>(PTHR11532:SF59)                                 | metalloprotease                                                                               | 1.107         | 2.13E-07 | 0.001172            |
| 2   | <b>KSR1</b><br>Kinase suppressor of<br>Ras 1                           | KINASE SUPPRESSOR OF RAS<br>1 (PTHR23257:SF413)                        | non-receptor<br>serine/threonine protein<br>kinase<br>non-receptor tyrosine<br>protein kinase | 0.8648        | 9.15E-06 | 0.01909             |
| 3   | <b>RASD1</b><br>Dexamethasone-<br>induced Ras-related<br>protein 1     | DEXAMETHASONE-INDUCED<br>RAS-RELATED PROTEIN 1<br>(PTHR24070:SF255)    | small GTPase                                                                                  | 1.605         | 1.04E-05 | 0.01909             |
| 4   | <b>ADCY3</b><br>Adenylate cyclase<br>type 3                            | ADENYLATE CYCLASE TYPE<br>3 (PTHR11920:SF291)                          | adenylate cyclase<br>guanylate cyclase                                                        | 0.8997        | 1.29E-05 | 0.02012             |
| 5   | <b>DUSP4</b><br>Dual specificity<br>protein phosphatase 4              | DUAL SPECIFICITY PROTEIN<br>PHOSPHATASE 4<br>(PTHR10159:SF111)         | -                                                                                             | 1.297         | 1.42E-05 | 0.02012             |
| 6   | <b>PDE4D</b><br>cAMP-specific 3',5'-<br>cyclic<br>phosphodiesterase 4D | CAMP-SPECIFIC 3',5'-CYCLIC<br>PHOSPHODIESTERASE 4D<br>(PTHR11347:SF91) | phosphodiesterase                                                                             | 1.083         | 1.47E-05 | 0.02012             |
| 7   | <b>PLXNA4</b><br>Plexin-A4                                             | PLEXIN-A4 (PTHR22625:SF34)                                             | tyrosine protein kinase<br>receptor<br>signaling molecule<br>protein kinase                   | 1.232         | 2.43E-05 | 0.02859             |
| 8   | <b>CCL14</b><br>C-C motif chemokine<br>14                              | C-C MOTIF CHEMOKINE 14<br>(PTHR12015:SF110)                            | chemokine                                                                                     | 1.212         | 3.10E-05 | 0.03001             |

|    |                                                                                       |                                                                                     |                                                    |        |          |         |
|----|---------------------------------------------------------------------------------------|-------------------------------------------------------------------------------------|----------------------------------------------------|--------|----------|---------|
| 9  | <b>DMD</b><br>Dystrophin                                                              | DYSTROPHIN<br>(PTHR11915:SF261)                                                     | non-motor actin binding<br>protein                 | 0.9328 | 3.29E-05 | 0.03006 |
| 10 | <b>AGT</b><br>Angiotensinogen                                                         | ANGIOTENSINOGEN<br>(PTHR11461:SF13)                                                 | serine protease inhibitor                          | 1.732  | 6.87E-05 | 0.05489 |
| 11 | <b>SHC2</b><br>SHC-transforming<br>protein 2                                          | SHC-TRANSFORMING<br>PROTEIN 2 (PTHR10337:SF5)                                       | signaling molecule                                 | 1.574  | 7.00E-05 | 0.05489 |
| 12 | <b>SFRP1</b><br>Secreted frizzled-<br>related protein 1                               | SECRETED FRIZZLED-<br>RELATED PROTEIN 1<br>(PTHR11309:SF87)                         | signaling molecule<br>G-protein coupled receptor   | 0.953  | 7.41E-05 | 0.05551 |
| 13 | <b>LMOD1</b><br>Leiomodin-1                                                           | LEIOMODIN-1<br>(PTHR10901:SF5)                                                      | non-motor actin binding<br>protein                 | 1.02   | 0.000143 | 0.09593 |
| 14 | <b>CRISPLD2</b><br>Cysteine-rich<br>secretory protein<br>LCCL domain-<br>containing 2 | CYSTEINE-RICH SECRETORY<br>PROTEIN LCCL DOMAIN-<br>CONTAINING 2<br>(PTHR10334:SF64) | defense/immunity protein                           | 1.631  | 0.000146 | 0.09593 |
| 15 | <b>NTN1</b><br>Netrin-1                                                               | NETRIN-1 (PTHR10574:SF219)                                                          | receptor<br>extracellular matrix linker<br>protein | 1.48   | 0.000154 | 0.09774 |
| 16 | <b>IGF1</b><br>Insulin-like growth<br>factor I                                        | INSULIN-LIKE GROWTH<br>FACTOR I (PTHR11454:SF4)                                     | growth factor<br>peptide hormone                   | 1.159  | 0.000195 | 0.1009  |
| 17 | <b>NTRK2</b><br>BDNF/NT-3 growth<br>factors receptor                                  | BDNF/NT-3 GROWTH<br>FACTORS RECEPTOR<br>(PTHR24416:SF136)                           | -                                                  | 1.176  | 0.000195 | 0.1009  |
| 18 | <b>PKDCC</b><br>Protein kinase<br>domain-containing<br>protein, cytoplasmic           | PROTEIN KINASE DOMAIN-<br>CONTAINING PROTEIN,<br>CYTOPLASMIC<br>(PTHR26392:SF77)    | non-receptor<br>serine/threonine protein<br>kinase | 0.9649 | 0.000196 | 0.1009  |
